# Supplementary material
Source: MDPI journal article supplement (https://www.mdpi.com/2076-3417/8/1/52)
Supplement: s1 [file s1]

Article

Thermal Stability and Tuning of Thermoelectric Properties of Ag1−*x*Sb1+*x*Te2+*x* (0 ≤ *x* ≤ 0.4) Alloys

Paweł Wyżga 1,2,3,*, Igor Veremchuk 3,*, Ulrich Burkhardt 3, Paul Simon 3, Yuri Grin 3 and Krzysztof T. Wojciechowski 2

1 Institut für Experimentelle Physik, TU Bergakademie Freiberg, Leipziger Str. 23, 09599 Freiberg, Germany;

2 Thermoelectric Research Laboratory, Faculty of Materials Science and Ceramics, AGH University of Science and Technology, A. Mickiewicza Av. 30, 30-059 Krakow, Poland; wojciech@agh.edu.pl (K.T.W.)

3 Max-Planck-Institut für Chemische Physik fester Stoffe, Nöthnitzer Str. 40, 01187 Dresden, Germany; ulrich.burkhardt@cpfs.mpg.de (U.B.); paul.simon@cpfs.mpg.de (P.S.); grin@cpfs.mpg.de (Y.G.);

***** Correspondence: pawel.wyzga@physik.tu-freiberg.de (P.W.); igor.veremchuk@cpfs.mpg.de (I.V.); Tel.: +49-351-46464000

Received: 14 November 2017; Accepted: 25 December 2017; Published: 1 January 2018

Supplementary Materials

1. Differential Thermal Analysis Coupled with Thermogravimetry (TG-DTA)

Thermal analysis was performed for slowly cooled Ag1.0Sb1.0Te2.0 and Ag0.81Sb1.19Te2.19 samples (*x* = 0 and *x* = 0.19). Thermal effects around 630 K and 830 K originate from the formation/decomposition reaction and the incongruent melting of the *β* phase, respectively. Additional weak peaks associated with reactions within Ag-Te binary system are present only for Ag1.0Sb1.0Te2.0 sample (Figure S1a). All thermal effect together with corresponding reactions are given in Table S1. Mass loss during heating was smaller than 0.5%. Peak at 377 K for measurement 2 of Ag0.81Sb1.19Te2.19 sample is an artifact (Figure S1b).

|   (**a**) |   (**b**) |
| --- | --- |

**Figure S1.** (**a**) TG-DTA analysis of slowly cooled Ag1.0Sb1.0Te2.0 and (**b**) DTA analysis of slowly cooled Ag0.81Sb1.19Te2.19 samples. Besides thermal effect from the *β* phase Ag1−*x*Sb1+*x*Te2+*x*, small endothermal peaks (at 418 K and 693 K) are visible for Ag1.0Sb1.0Te2.0 sample only. They are associated with reactions within Ag-Te binary system.

**Table S1.** Thermal effects observed in DTA curves with corresponding reactions.

| **Temperature** | **Reaction Equation** |
| --- | --- |
| 418 K | (*α*)Ag2Te ↔ (*β*)Ag2Te (418 K [31]) |
| 633–659 K | Sb2Te3 + (*β*)Ag2Te ↔ *β* (633 K [10]) |
| 693 K | (*β*)Ag5Te3 ↔ (*β*)Ag1.9Te + L (733 K [31]) |
| 797–809 K | *β +* (*β*)Ag2Te ↔ L (821 K [10]) |
| 822–837 K | *β* ↔ L (828 K [10]) |

References from the main text.

2. .Microstructure Analysis

In order to emphasize Widmanstätten-like pattern in Ag0.6Sb1.4Te2.4 sample (Figure S2a), the surface was etched.


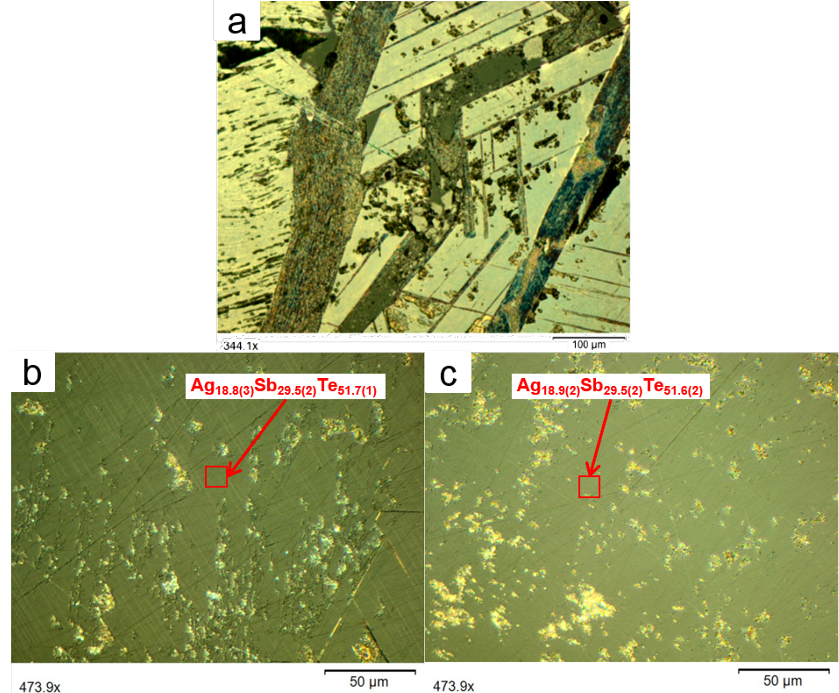


**Figure S2.** (**a**) Optical bright-field micrographs of slowly cooled *x* = 0.4 sample. Polarised-light micrograph of the (**b**) slowly cooled and (**c**) quenched *x* = 0.19 sample. Chemical composition according to EDXS analysis.

Backscattered-electron images, together with average chemical composition of the *β* phase for

the Ag1−*x*Sb1+*x*Te2+*x* samples are presented in Figures S3 and S4.


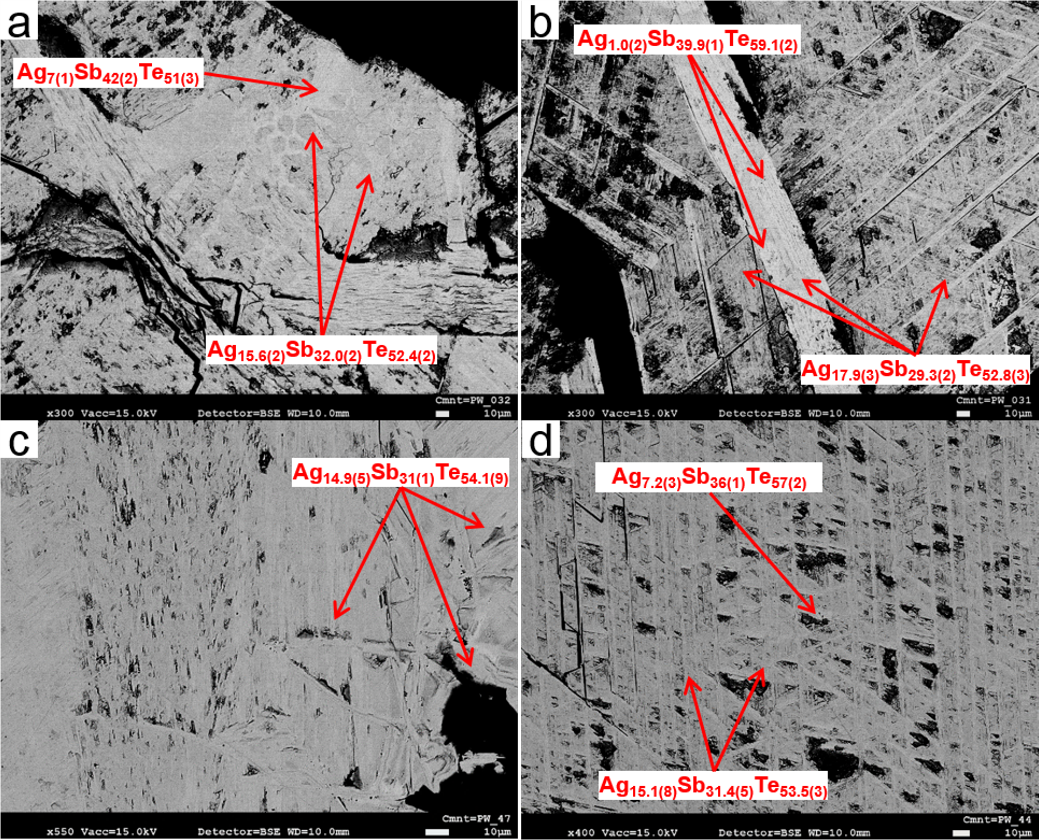


**Figure S3.** Backscattered-electron (BSE) images of the Ag1-*x*Sb1+*x*Te2+*x* samples. (**a**,**b**) *x* = 0.4, (**c**,**d**) *x* = 0.3. Quenched samples—(**a**,**c**), slowly-cooled samples (**b**,**d**). Average chemical composition from indicated regions (red arrows) according to EDXS analysis.


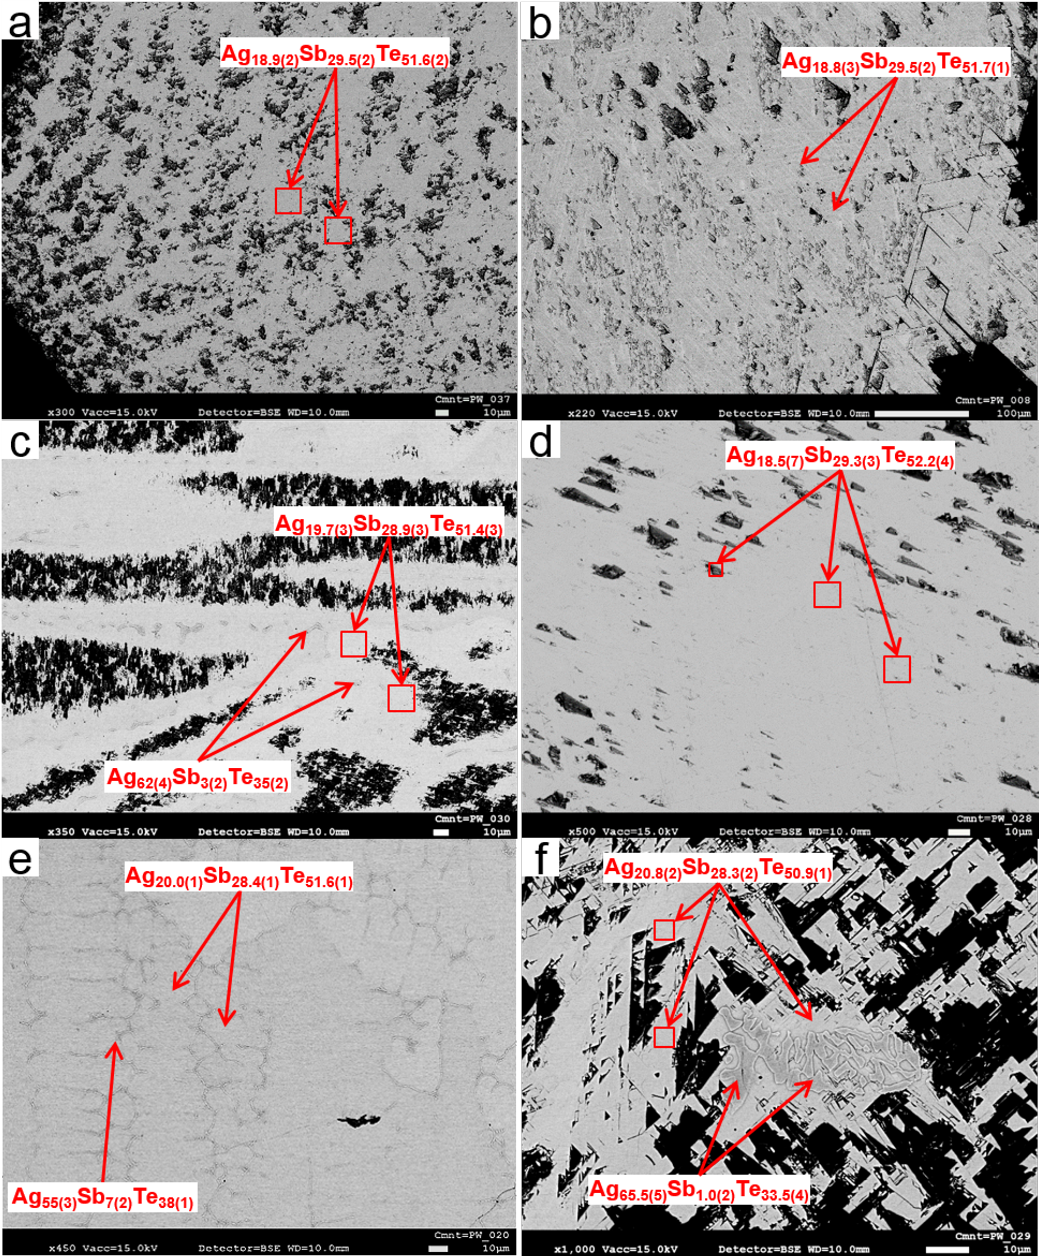


**Figure S4.** Backscattered-electron (BSE) images of the Ag1−*x*Sb1+*x*Te2+*x* samples: (**a**,**b**) *x* = 0.19, (**c**,**d**) *x* = 0.17, (**e**,**f**) *x* = 0.1. Quenched samples—(**a**,**c**,**e**), slowly-cooled samples (**b**,**d**,**f**). Average chemical composition from indicated regions (red arrows) according to EDXS analysis.

3. Chemical Composition of the β Phase according to EDXS Analysis.

Comparison of nominal and real element concentrations of the *β* phase (according to EDXS) in the samples after synthesis is given in Figure S5. Dashed lines show real concentrations equal to nominal values. For *x* = 0.4, real concentration of Ag in the *β* phase is higher than nominal one (2 and 4 at. % excess for quenched and slowly cooled samples, respectively). While decreasing *x*, excess is changing into deficiency reaching 5 at. % for *x* = 0 samples (Figure S5a). Real Sb concentration is mainly higher than nominal value (except the slowly cooled *x* = 0.4 sample). For larger *x*, differences are decreasing almost to 0, within experimental error (for the quenched *x* = 0.4 sample, Figure S5b). Real compositions of the *x* = 0 and 0.1 samples are almost identical. It proves that the compositions of the *β* phase are non-stoichiometric (see discussion in the main text). Te concentrations oscillate and deviations are much smaller than those of Ag and Sb (<2.5 at. %, Figure S5c). Since dashed lines indicate nominal element concentrations according to phase diagram of the Sb2Te3-Ag2Te system, real chemical composition of the *β* phase in obtained samples is probably excluded from that pseudobinary section. Real element concentrations for the *x* = 0–0.19 samples after different synthesis method are very similar. EDXS element concentrations for the *x* = 0.3–0.4 and slowly cooled *x* = 0.19 samples can be affected by the anisotropic distribution of impurities.

|   (**a**) |   (**b**) |
| --- | --- |
|   (**c**) | |

**Figure S5.** Real element concentration of: (**a**) Ag, (**b**) Sb, (**c**) Te as a function of nominal concentration in the Ag1−*x*Sb1+*x*Te2+*x* samples. Dashed lines show real concentrations equal to nominal values.

4. .Transmission Electron Microscopy

Large ideally ordered regions of ~ 50 nm size were found within particle I (Figure S6). On the contrary, analogous nanodomain within particle II are much smaller (~2 nm, 3–4 unit cells, Figure 12d). Such broad distribution of domain size together with the presence of structural distortions within domain’s boundaries are important factors for phonon scattering processes and reduction of lattice thermal conductivity.


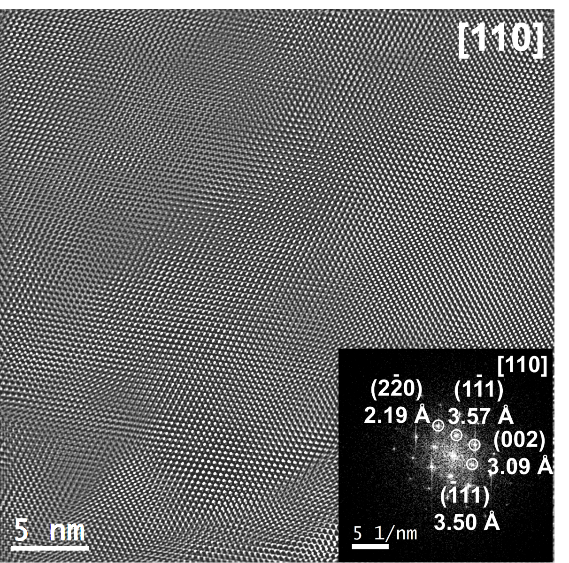


**Figure S6.** HRTEM image of particle I of Ag0.81Sb1.19Te2.19 sample (*x* = 0.19). FFT filtered HR image of selected area within particle I reveals perfect atomic arrangement in agreement with NaCl type structure. FFT pattern consists of sharp reflections and interplanar distances coincide with PXRD data.
